# Supplementary material for: Association Between SGLT2 Inhibitor Use and Hepatocellular Carcinoma Risk in Type 2 Diabetes: A Systematic Review and Meta-Analysis
Source: MDPI journal article supplement (doi:10.3390/biomedicines14051168), 2026-05-21
Supplement: s1 [file Supplementary File S1_PRISMA_Checklist_v9_0_FINAL.pdf › Supplementary File S1_PRISMA_Checklist_v9_0_FINAL.pdf]

**Supplementary File S1. PRISMA 2020 Checklist Page references correspond to the revised clean manuscript included in this package.**

| Section / Topic | Item | Checklist item (abbrev.)                             | Manuscript page(s)                    |
|-----------------|------|------------------------------------------------------|---------------------------------------|
| Title           | 1    | Identify report as a systematic review/meta-analysis | 1                                     |
| Abstract        | 2    | Structured abstract                                  | 1                                     |
| Introduction    | 3    | Rationale                                            | 2                                     |
| Introduction    | 4    | Objectives                                           | 2                                     |
| Methods         | 5    | Eligibility criteria                                 | 3                                     |
| Methods         | 6    | Information sources                                  | 3                                     |
| Methods         | 7    | Search strategy                                      | 3; Supplementary Table S1             |
| Methods         | 8    | Selection process                                    | 3                                     |
| Methods         | 9    | Data collection process                              | 3                                     |
| Methods         | 10   | Data items                                           | 3                                     |
| Methods         | 11   | Study risk of bias assessment                        | 3                                     |
| Methods         | 12   | Effect measures                                      | 3                                     |
| Methods         | 13   | Synthesis methods                                    | 3-4                                   |
| Methods         | 14   | Reporting bias assessment                            | 4                                     |
| Methods         | 15   | Certainty assessment                                 | 4                                     |
| Results         | 16   | Study selection                                      | 4                                     |
| Results         | 17   | Study characteristics                                | 4                                     |
| Results         | 18   | Risk of bias in studies                              | 5                                     |
| Results         | 19   | Results of individual studies                        | 5; Figure 2; Table 1                  |
| Results         | 20   | Results of syntheses                                 | 4-5; Table 3; Supplementary Figure S1 |
| Results         | 21   | Reporting biases                                     | 5                                     |
| Results         | 22   | Certainty of evidence                                | 5                                     |
| Discussion      | 23   | Discussion and limitations                           | 5-6                                   |

|       |    |                                |                          |
|-------|----|--------------------------------|--------------------------|
| Other | 24 | Registration and protocol      | 3; Title Page            |
| Other | 25 | Support                        | Title Page               |
| Other | 26 | Competing interests            | Title Page               |
| Other | 27 | Availability of data/materials | Title Page; Cover Letter |
