# Supplementary material for: Association Between SGLT2 Inhibitor Use and Hepatocellular Carcinoma Risk in Type 2 Diabetes: A Systematic Review and Meta-Analysis
Source: MDPI journal article supplement (doi:10.3390/biomedicines14051168), 2026-05-21
Supplement: s1 [file Supplementary_Table_S1_Search_Strategies_v9_0_FINAL.pdf › Supplementary_Table_S1_Search_Strategies_v9_0_FINAL.pdf]

## Supplementary Table S1. Full database-specific search strategies

### PubMed

((SGLT2 inhibitor\*[Title/Abstract]) OR sodium-glucose cotransporter-2 inhibitor\*[Title/Abstract] OR dapagliflozin[Title/Abstract] OR empagliflozin[Title/Abstract] OR canagliflozin[Title/Abstract] OR ertugliflozin[Title/Abstract] OR ipragliflozin[Title/Abstract]) AND ((type 2 diabetes[Title/Abstract]) OR T2DM[Title/Abstract] OR diabetes mellitus, type 2[MeSH Terms]) AND ((hepatocellular carcinoma[Title/Abstract]) OR HCC[Title/Abstract] OR liver cancer[Title/Abstract] OR liver neoplasm\*[Title/Abstract]).

### Embase

(sglt2 inhibitor\*:ti,ab OR sodium glucose cotransporter 2 inhibitor\*:ti,ab OR dapagliflozin:ti,ab OR empagliflozin:ti,ab OR canagliflozin:ti,ab OR ertugliflozin:ti,ab) AND (type 2 diabetes:ti,ab OR t2dm:ti,ab) AND (hepatocellular carcinoma:ti,ab OR hcc:ti,ab OR liver cancer:ti,ab).

### Cochrane Library

(SGLT2 inhibitor OR sodium-glucose cotransporter-2 inhibitor OR dapagliflozin OR empagliflozin OR canagliflozin OR ertugliflozin OR ipragliflozin) in Title Abstract Keyword AND (type 2diabetes OR T2DM) AND (hepatocellular carcinoma OR HCC OR liver cancer).

**Final search date:** 15 March 2026.
