# Supplementary material for: Association Between SGLT2 Inhibitor Use and Hepatocellular Carcinoma Risk in Type 2 Diabetes: A Systematic Review and Meta-Analysis
Source: MDPI journal article supplement (doi:10.3390/biomedicines14051168), 2026-05-21
Supplement: s1 [file Supplementary_Table_S2_Extraction_Sheet_v9_0_FINAL.pdf › Supplementary_Table_S2_Extraction_Sheet_v9_0_FINAL.pdf]

**Supplementary Table S2. Study-level extraction sheet**

| Study      | Exposure definition                                  | Comparator definition                                     | Effect measure | Adjusted estimate | Covariates adjusted                           | Notes                                                                   |
|------------|------------------------------------------------------|-----------------------------------------------------------|----------------|-------------------|-----------------------------------------------|-------------------------------------------------------------------------|
| Bea 2023   | Incident SGLT2i use                                  | DPP-4 inhibitor                                           | HR             | 0.81 (0.67–0.98)  | Demographics, liver risk, diabetes covariates | General T2DM cohort; Korean national claims data                        |
| Chou 2024  | SGLT2i exposure                                      | DPP-4 inhibitor                                           | HR             | 0.42 (0.28–0.79)  | Multivariable adjustment / matching           | Comparator retained for pooling                                         |
| Cho 2024   | SGLT2i exposure in FLD + T2DM; CVH subgroup reported | Non-SGLT2i therapy                                        | aHR            | 0.43 (0.29–0.63)  | Multivariable adjustment                      | Korean HIRA FLD/T2DM cohort; chronic viral hepatitis subgroup available |
| Choi 2025  | SGLT2i exposure                                      | DPP-4 inhibitor retained from multiple active comparators | sHR            | 0.53 (0.30–0.93)  | Active-comparator EHR cohort covariate set    | United States/Korean EHR data; active-comparator framework              |
| Kang 2026  | SGLT2i exposure in viral hepatitis+T2DM              | Non-SGLT2i / alternative antidiabetic therapy             | sHR            | 0.77 (0.66–0.91)  | Nationwide adjusted model                     | Korean nationwide viral hepatitis + T2DM cohort                         |
| Huynh 2023 | Metformin + SGLT2i dual therapy                      | Metformin monotherapy                                     | HR             | 0.43 (0.21–0.88)  | Propensity score matching / adjusted analyses | TriNetX cirrhosis + T2DM cohort; metformin monotherapy comparator       |
