# Supplementary material for: Association Between SGLT2 Inhibitor Use and Hepatocellular Carcinoma Risk in Type 2 Diabetes: A Systematic Review and Meta-Analysis
Source: MDPI journal article supplement (doi:10.3390/biomedicines14051168), 2026-05-21
Supplement: s1 [file Supplementary_Table_S3_LOO_v9_0_FINAL.pdf › Supplementary_Table_S3_LOO_v9_0_FINAL.pdf]

**Supplementary Table S3. Leave-one-out sensitivity analysis results (REML random-effects model)**

| Study excluded | Pooled HR (95% CI) | I <sup>2</sup> (%) |
|----------------|--------------------|--------------------|
| Bea (2023)     | 0.53 (0.39–0.72)   | 62.2               |
| Chou (2024)    | 0.62 (0.47–0.83)   | 75.7               |
| Cho (2024)     | 0.64 (0.48–0.84)   | 70.8               |
| Choi (2025)    | 0.59 (0.43–0.81)   | 80.9               |
| Kang (2026)    | 0.54 (0.39–0.74)   | 64.1               |
| Huynh (2023)   | 0.61 (0.45–0.81)   | 78.7               |

All analyses used the restricted maximum likelihood (REML) estimator. The pooled estimate remained below 1.0 across all leave-one-out iterations, with a range of 0.53 to 0.64, indicating that no single study disproportionately influenced the overall result. Analyses were performed using R version 4.5.2 (R Foundation for Statistical Computing, Vienna, Austria) with the metafor package (version 4.8-0).
