# Supplementary material for: Association Between SGLT2 Inhibitor Use and Hepatocellular Carcinoma Risk in Type 2 Diabetes: A Systematic Review and Meta-Analysis
Source: MDPI journal article supplement (doi:10.3390/biomedicines14051168), 2026-05-21
Supplement: s1 [file Supplementary_Table_S4_Sensitivity_v9_0_FINAL.pdf › Supplementary_Table_S4_Sensitivity_v9_0_FINAL.pdf]

### Supplementary Table S4. Sensitivity and subgroup analyses (REML random-effects model)

| Analysis                                           | k | Pooled HR (95% CI) | I <sup>2</sup> (%) | tau <sup>2</sup> |
|----------------------------------------------------|---|--------------------|--------------------|------------------|
| Primary analysis                                   | 6 | 0.59 (0.45–0.77)   | 75.2               | 0.0740           |
| Sensitivity: Excluding Huynh (2023)                | 5 | 0.61 (0.45–0.81)   | 78.7               | 0.0760           |
| DPP-4i-restricted active-comparator                | 3 | 0.60 (0.39–0.92)   | 67.4               | 0.0923           |
| Subgroup: Asian cohorts                            | 4 | 0.61 (0.44–0.86)   | 85.0               | 0.0950           |
| Subgroup: Non-Asian or multi-institutional cohorts | 2 | 0.49 (0.31–0.76)   | 0.0                | 0.0000           |
| Subgroup: CLD-enriched cohorts                     | 3 | 0.56 (0.36–0.86)   | 74.6               | 0.1047           |
| Subgroup: General T2DM cohorts                     | 3 | 0.60 (0.39–0.92)   | 67.4               | 0.0923           |

Notes:

All analyses used the restricted maximum likelihood (REML) estimator. The 95% prediction interval for the primary analysis was 0.25–1.37 (t-distribution, df = k-2 = 4).

Asian cohorts: Bea (2023), Chou (2024), Cho (2024), Kang (2026). Non-Asian or multi-institutional cohorts: Choi (2025), Huynh (2023).

CLD-enriched cohorts: Cho (2024, FLD/T2DM and CVH-enriched cohort), Kang (2026, viral hepatitis+T2DM), Huynh (2023, cirrhosis+T2DM). General T2DM cohorts: Bea (2023), Chou (2024), Choi (2025).

The "General T2DM cohorts" subgroup comprises the same three studies as the DPP-4i-restricted active-comparator analysis, hence the identical pooled estimate and I<sup>2</sup> value.

E-value for the primary pooled estimate: 2.78; E-value for the confidence limit closest to the null: 1.92.

Analyses were performed using R version 4.5.2 (R Foundation for Statistical Computing, Vienna, Austria) with the metafor package (version 4.8-0).
